# Supplementary material
Source: Springer Nature journal article supplement (https://www.springermedizin.de/resource/supplementary/12958_2009_562_MOESM3_ESM.pdf/9568322)
Supplement: MOESM3 [file 9568322]

Table 3. Alignments of cysteines and disulfide bridges in GPA2 from various species

|                 | k | loop 1 |   |   | ring |   |   |   | loop 2 | k  | loop 3 |   |    | ring |    |   | C-term |   |   |    |
|-----------------|---|--------|---|---|------|---|---|---|--------|----|--------|---|----|------|----|---|--------|---|---|----|
|                 | 1 |        | I |   | 2    |   |   |   | 3      |    | II     | 4 |    | III  |    | 5 |        | 6 |   | IV |
| <i>hGPA2</i>    | C | 16     | C | 8 | C    | 1 | G | 1 | C      | 26 | C      | C | 13 | C    | 15 | C | 1      | C | 2 | C  |
| <i>mamals</i>   | C | 16     | C | 8 | C    | 1 | G | 1 | C      | 26 | C      | C | 13 | C    | 15 | C | 1      | C | 2 | C  |
| <i>branch.</i>  | C | 13     | C | 9 | C    | 1 | G | 1 | C      | 26 | C      | C | 13 | C    | 14 | C | 1      | C | 2 | C  |
| <i>anophel.</i> | C | 13     | C | 9 | C    | 1 | G | 1 | C      | 26 | C      | C | 13 | C    | 14 | C | 1      | C | 2 | C  |
| <i>culqu</i>    | C | 13     | C | 9 | C    | 1 | G | 1 | C      | 26 | C      | C | 13 | C    | 14 | C | 1      | C | 2 | C  |
| <i>drosoph.</i> | C | 13     | C | 9 | C    | 1 | G | 1 | C      | 30 | C      | C | 13 | C    | 14 | C | 1      | C | 2 | C  |
| <i>bombyx</i>   | C | 13     | C | 9 | C    | 1 | G | 1 | C      | 23 | C      | C | 13 | C    | 14 | C | 1      | C | 2 | C  |
